# Supplementary material
Source: publisher figshare collection journal article supplement (https://frontiersin.figshare.com/ndownloader/files/23771006)
Supplement: Supplementary file 1 [file 23771006]

Supplementary Material

**Supplementary Table 1.** Movements of reef manta rays (*Mobula alfredi*) between the Island Groups of Seychelles recorded using photo-identification.

| **Manta ID** | **Sex** | **Maturity** | **D'Arros Island (Amirantes Group)** | **St. François Atoll (Alphonse Group)** | **Time between resightings (days)** | **Approx. Distance (km)** |
| --- | --- | --- | --- | --- | --- | --- |
| SC-MA-0021 | Female | Sub-adult | 13 Mar 2017 | 14 Dec 2018 | 641 | 198 |
| SC-MA-0032 | Female | Adult | 28 Jun 2013 | 8 Dec 2017 | 1,624 | 200 |
| SC-MA-0190 | Male | Adult | 26 Nov 2017 | 10 Dec 2017 | 14 | 195 |
